# Supplementary material
Source: MDPI journal article supplement (https://www.mdpi.com/1999-4907/7/10/239)
Supplement: s1 [file s1]

Supplementary Materials: Effects of Drought and Rewetting on Growth and Gas Exchange of Minor European Broadleaved Tree Species

Jörg Kunz *, Annemarie Räder and Jürgen Bauhus


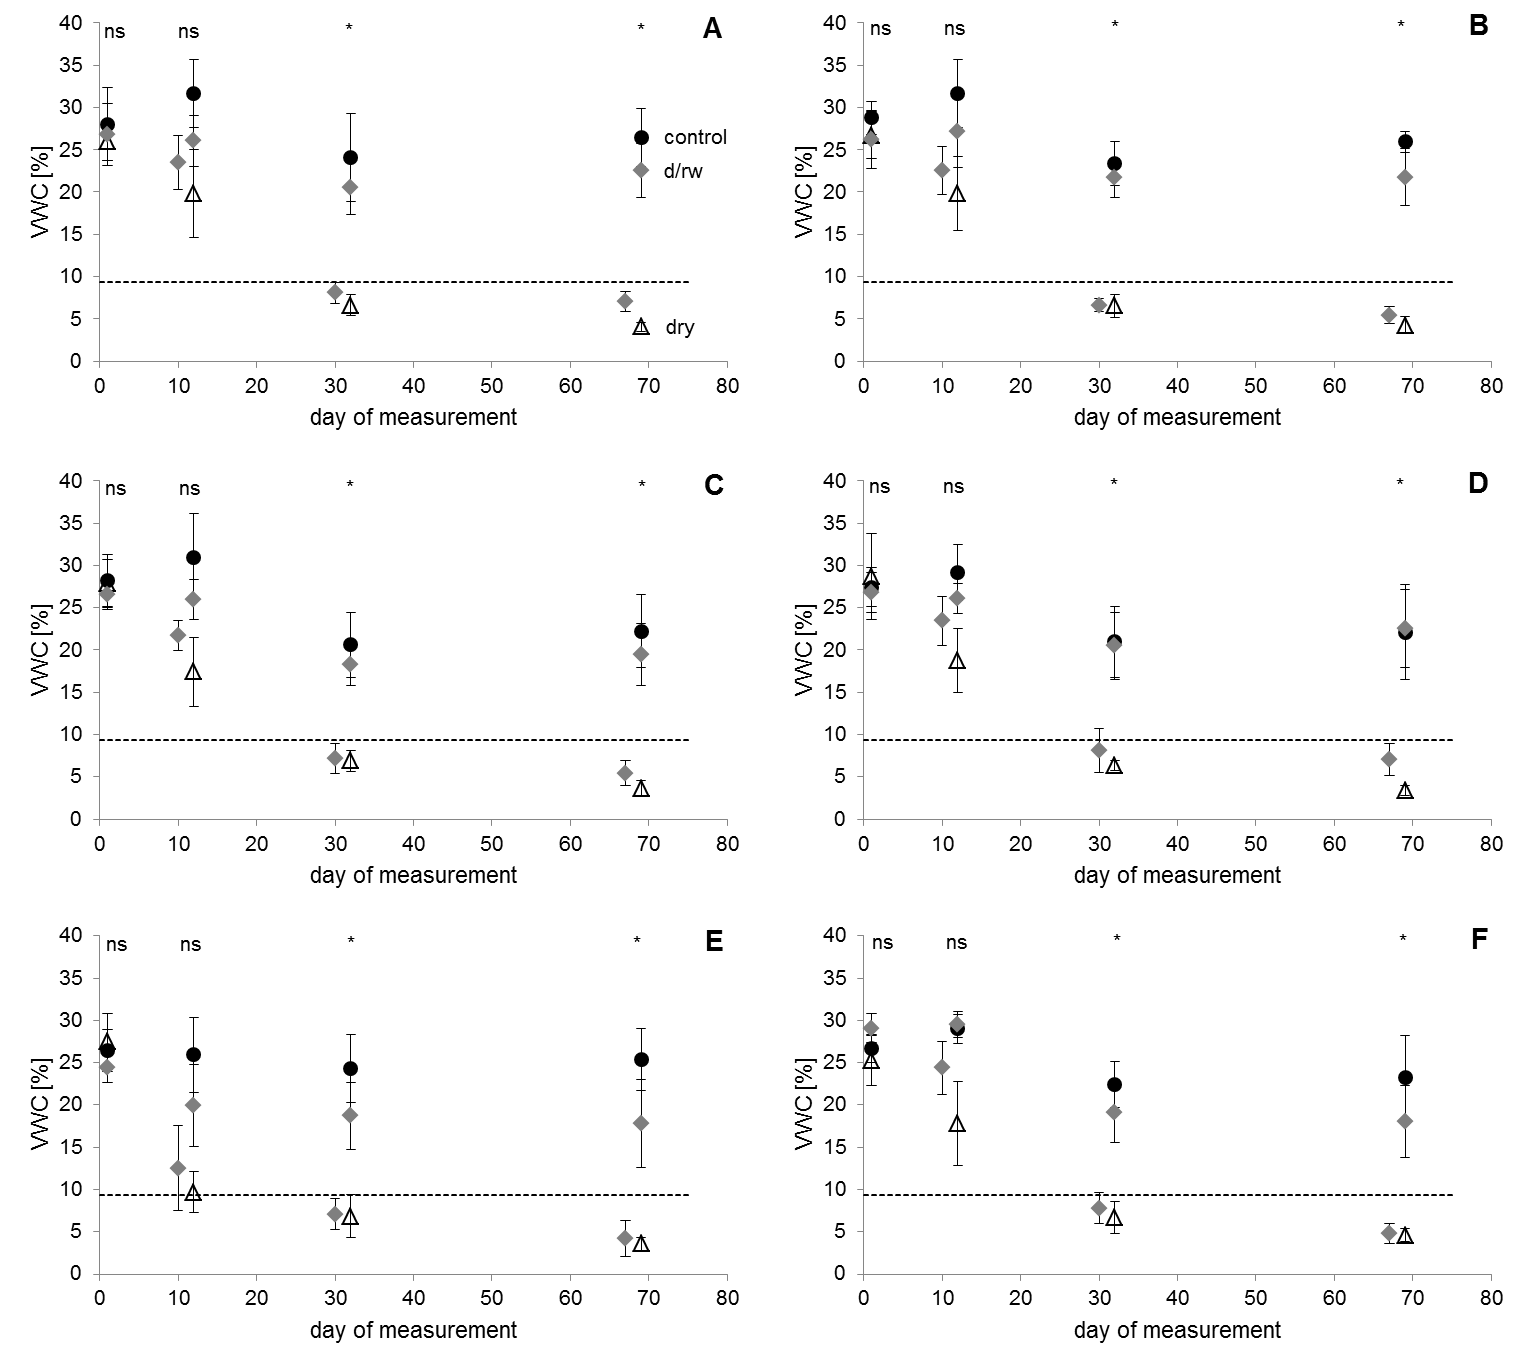


**Figure S1.** Mean values of soil volumetric water content (VWC) at different points in time of the experiment for plants of the control (filled circles), the drying/rewetting (d/rw; grey diamonds), and the dry (empty triangles) treatment groups for *Quercus petraea* (indicated by **A**, top left panel; *N* =86 measurements with 18 plants), *Fagus sylvatica* (**B**; *N* = 84 measurements with 18 plants), *Acer campestre* (**C**; *N* = 87 measurements with 18 plants), *A. platanoides* (**D**; *N* = 82 measurements with 18 plants), *Sorbus torminalis* (**E**; *N* = 82 measurements with 18 plants), and *S. domestica* (**F**; *N* = 83 measurements with 18 plants). Error bars indicate standard deviation. The dashed horizontal line represents the permanent wilting point (9.4 % VWC at pF 4.2) of the soil. Asterisks indicate significant differences between the irrigation regimes (*p* < 0.05); ‘ns’ indicates no significant difference. Day 1 was 25 June 2012.

**Table S1.** Means and standard deviation (±SD) of shoot length, root length, fresh plant mass, and plant age at the beginning of the experiment. Different letters indicate significant differences between the tree species (*p* < 0.05), *N* = 18 per tree species.

| **Species** | **Shoot Length [cm]** | **±SD** | **Root Length [cm]** | **±SD** | **Fresh Plant Mass [g]** | **±SD** | **age [a]** | **±SD** |
| --- | --- | --- | --- | --- | --- | --- | --- | --- |
| *Q. petraea* | 15.6 d | 3.4 | 13.8 c | 3.6 | 6.3 c | 4.5 | 3.4 c | 1.2 |
| *F. sylvatica* | 25.7 bc | 6.4 | 13.1 c | 3.4 | 4.8 c | 2.9 | 5.7 a | 1.5 |
| *A. campestre* | 19.2 cd | 7.6 | 14.8 c | 3.2 | 5.2 c | 3.6 | 4.4 b | 1.4 |
| *A. platanoides* | 22.1 c | 6.7 | 17.1 b | 4.1 | 5.5 c | 2.9 | 4.3 b | 1.0 |
| *S. torminalis* | 38.2 a | 5.9 | 24.1 a | 3.6 | 31.7 a | 12.8 | 3.0 c | 0.0 |
| *S. domestica* | 31.8 b | 4.1 | 23.2 a | 2.2 | 14.0 b | 2.8 | 2.0 d | 0.0 |

**Table S2.** Means and standard deviation (±SD) of specific leaf area (SLA), and relative water content of the leaves of the control, drying/rewetting (d/rw), and dry treatment groups at the end of the experiment. Different letters indicate significant differences between the tree species and irrigation regimes (*p* < 0.05), *N* = 18 per tree species.

|  |  | **Control** | | **d/rw** | | **Dry** | |  |
| --- | --- | --- | --- | --- | --- | --- | --- | --- |
| **Variable** | **Species** | **Mean** | **±SD** | **Mean** | **±SD** | **Mean** | **±SD** | *p* **irrigation** |
| SLA [m²·kg−1] | *Q. petraea* | 12.2 a | 1.0 | 12.6 a | 1.6 | 14.0 a | 1.6 | 0.156 |
|  | *F. sylvatica* | 23.2 c | 6.0 | 21.6 c | 2.4 | 20.6 c | 0.9 |
|  | *A. campestre* | 11.8 a | 1.9 | 12.9 a | 0.8 | 13.9 a | 0.7 |
|  | *A. platanoides* | 17.2 b | 2.1 | 18.7 b | 2.5 | 18.4 b | 1.9 |
|  | *S. torminalis* | 11.8 a | 0.7 | 12.8 a | 1.9 | 12.3 a | 1.2 |
|  | *S. domestica* | 10.8 a | 1.4 | 11.9 a | 0.7 | 11.6 a | 1.3 |
|  | *p* species | 0.001 | | | | | | 0.205 |
| leaf water content [%] | *Q. petraea* | 56.9 a | 0.8 | 56.9 a | 2.8 | 31.2 bc | 7.7 | 0.001 |
|  | *F. sylvatica* | 54.9 a | 4.2 | 53.4 a | 2.1 | 31.5 bc | 10.6 |
|  | *A. campestre* | 53.0 a | 4.2 | 57.3 a | 3.4 | 41.4 b | 17.0 |
|  | *A. platanoides* | 53.5 a | 4.7 | 55.0 a | 3.5 | 37.2 b | 11.5 |
|  | *S. torminalis* | 43.3 b | 15.5 | 44.7 b | 2.7 | 25.8 c | 13.3 |
|  | *S. domestica* | 52.1 a | 2.7 | 50.6 a | 3.3 | 39.2 b | 12.4 |
|  | *p* species | 0.001 | | | | | | 0.594 |

**Table S3.** Rates for shoot dieback and leaf senescence in seedlings of the drying/rewetting (d/rw), and dry treatments at the end of the experiment; no leaf senescence and shoot dieback occurred in the controls. *N* = 18 per tree species.

| **Variable** | **Species** | **d/rw** | **Dry** |
| --- | --- | --- | --- |
| dead seedlings [%] | *Q. petraea* | 0 | 33 |
|  | *F. sylvatica* | 0 | 33 |
|  | *A. campestre* | 0 | 0 |
|  | *A. platanoides* | 0 | 0 |
|  | *S. torminalis* | 0 | 50 |
|  | *S. domestica* | 0 | 50 |
| leaf senescence [%] | *Q. petraea* | 0 | 67 |
|  | *F. sylvatica* | 17 | 50 |
|  | *A. campestre* | 0 | 50 |
|  | *A. platanoides* | 33 | 67 |
|  | *S. torminalis* | 17 | 100 |
|  | *S. domestica* | 17 | 83 |

**Table S4.** Means and standard deviation (±SD) of the total plant biomass to rooting volume ratio (BVR). Different letters indicate significant differences between the tree species (*p* < 0.05), *N* = 18 per tree species.

| **Species** | **BVR** | **±SD** |
| --- | --- | --- |
| *Q. petraea* | 0.9 c | 0.6 |
| *F. sylvatica* | 0.7 c | 0.3 |
| *A. campestre* | 1.1 bc | 0.6 |
| *A. platanoides* | 1.4 b | 0.9 |
| *S. torminalis* | 4.1 a | 1.8 |
| *S. domestica* | 1.8 ab | 0.8 |
